# Supplementary material for: Factors Influencing Disease Dynamics in Small-Scale Carp Polyculture in Bangladesh
Source: MDPI journal article supplement (doi:10.3390/ani14060966), 2024-03-20
Supplement: s1 [file s1]

# Health and Biosecurity problems in carp farming

1. Farmer details:

---

i. Farmer name:

---

ii. Mobile/email/contract details:

---

---

**Mobile**

---

---

**email**

---

---

**contract details**

---

---

iii. Farmer age:

---

iv. Gender:

☐ Male

☐ Female

**v. Education:**

- ☐ No education
- ☐ Primary (1-5)
- ☐ Higher Secondary (6-12)
- ☐ University (Bachelor/MS/more)

**vi. Occupation:**

---

---

**Primary occupation:**

---

---

**Secondary occupation:**

---

---

**viii. Farming experiences (Years):**

---

**2. Farm details:**

---

**i. Farm name:**

---

**ii. Address of the farm:**

---

---

**Village**

---

---

**Union**

---

---

**Sub-districts/Upazila**

---

---

**District**

---

---

**ii. Total Farm area***In decimal*  

---

**iv. Total water spread area***In decimal*  

---

**v. Number of ponds in the farm:**  

---

**vi. Farm type:**☐ Seasonal☐ perennial**vii. Culture type:**☐ Monoculture☐ Polyculture

**viii. Source of water:**

- ☐ Ground water
- ☐ River or canal
- ☐ Rain
- ☐ Nearby farm
- ☐ others

**If others please specify**

---

**3. Stocking information:****i. Species:****a. Carp species:**

- ☐ Rohu   ☐ Catla   ☐ Silvercarp   ☐ grass carp   ☐ Mrigala   ☐ Others
- ☐ common carp   ☐ bighead carp   ☐ Others

**i. Species:****b. Catfish:**

☐ Pangus ☐ Walking catfish ☐ Stinging catfish ☐ Tengra ☐ Others

---

**i. Species:**

---

---

**c. Other freshwater species:**

---

☐ Tilapia ☐ Climbing perch ☐ Snakehead ☐ Silver barb ☐ Freshwater prawn  
☐ Others

---

**i. Species:**

---

---

**d. Brackish water species:**

---

☐ Seabass ☐ mullet ☐ milkfish ☐ Shrimp ☐ Others

---

**ii. Source of fingerling:**

- ☐ hatchery
- ☐ nursery
- ☐ wild caught
- ☐ incoming water

**iii. Stocking number (total):**

---

**iv. Average percentage of Carp stocked?**

---

**4. Disease's information (In carp species)**

---

**i. Have you experienced any unusual mortality/diseases in carp species during last production cycle?**

- ☐ Yes
- ☐ No

**ii. If yes, Month and year of onset mortality/diseases?**

yyyy-mm-dd

---

**iii. Nature of mortality/diseases?**

- ☐ Sudden
- ☐ Gradual
- ☐ Occasional
- ☐ Multiple events

**iv. Duration of mortality/diseases?**

- ☐ Within a day
- ☐ Within a week
- ☐ Within a fortnight
- ☐ Within a month
- ☐ More than a month

**v. Percentage of total mortality ?**

---

**vi. Age and size of fish during diseases/mortality?**

---

---

**Culture days during diseases/mortality**

---

**Weight of fish during diseases/mortality**

---

---

**vii. Major clinical sign observed by the farmer?**

- ☐ Exophthalmia
- ☐ Shrinkage of eye
- ☐ Eye opacification
- ☐ Hemorrhages on skin and body surface
- ☐ Lesion
- ☐ Fin rot
- ☐ Tail rot
- ☐ Scale protrusion
- ☐ Abdominal distension
- ☐ Gill paleness
- ☐ Gill rot
- ☐ Others

**If others, please specify**

---

**viii. Major behavioral changes**

- ☐ Erratic swimming
- ☐ Appetite
- ☐ No schooling
- ☐ Others

**If others, please specify**

---

**ix. How do you dispose the dead fish?**

- ☐ Collect and discard to nearby river or canal
- ☐ Collect and buried on farm
- ☐ Collect and buried off farm
- ☐ Burnt
- ☐ Fed to another animal on farm
- ☐ Sale to the market
- ☐ Fish did not remove from the pond
- ☐ Others

**If others, please specify**

---

**x. Any treatment used?**

---

**a) Chemical treatment?**

- ☐ Yes
- ☐ No

**If yes please specify**

---

**Is the treatment effective?**

- ☐ Yes
- ☐ No

**b) Antibiotic treatment?**

- ☐ Yes
- ☐ No

**If yes please specify**

---

**Is the treatment effective?**

☐ Yes

☐ No

**c) Probiotic treatment?**

☐ Yes

☐ no

**If yes please specify**

---

**Is the treatment effective?**

☐ Yes

☐ No

**d) Other treatment?**

☐ Yes

☐ No

**If yes please specify**

---

**Is the treatment effective?**

☐ Yes

☐ No

**xi. Do you send any sample for diseases diagnosis?**

☐ Yes

☐ No

**If yes what was the diagnosis report?**

---

5. Biosecurity Practices

---

i. Biosecurity followed during pond preparation

---

**a) Fallow period:**

- ☐ No fallow period
- ☐ 1 week
- ☐ Fortnight
- ☐ Month
- ☐ More than a month

**b) Pond bottom drying:**

- ☐ Yes
- ☐ No

**c) Ploughing:**

- ☐ Yes
- ☐ No

**d) Bleaching:**

- ☐ Yes
- ☐ No

**If yes dose of bleaching***Kg/Decimal*

---

**e) Liming:**

- ☐ Yes
- ☐ No

**If yes dose of liming***Kg/Decimal*

---

**f) Other chemical treatment:**

- ☐ Yes
- ☐ No

**If yes, please specify the name**

---

ii. Biosecurity followed during stocking

---

**a) Vehicle tyre bath at the entry:**

- ☐ Yes
- ☐ No

**b) Fish disinfection:**

- ☐ Yes
- ☐ No

**c) Fish transport water discarded off farm:**

- ☐ Yes
- ☐ No

**d) Fish health inspection/quarantine before stocking:**

- ☐ Yes
- ☐ No

**e) Introduction of new stock with old stock:**

- ☐ Yes
- ☐ No

**iii. Use of on farm biosecurity**

---

**a) Farm perimeter fence?**

- ☐ Yes
- ☐ No

**b) Restriction of entrance for general people?**

- ☐ Yes
- ☐ No

**c) Restriction of entrance for domestic or other animals?**

- ☐ Yes
- ☐ No

**d) Vehicle disinfection?**

- ☐ Yes
- ☐ No

**e) Footbath?**

- ☐ Yes
- ☐ No

**f) Hand disinfection?**

- ☐ Yes
- ☐ No

**g) Equipment disinfection?**

- ☐ Yes
- ☐ No

**h) Shared equipment with other farm/s?**

- ☐ Yes
- ☐ No

**i) Hired harvester?**

- ☐ Yes
- ☐ No

**j) Hired harvesting equipment?**

- ☐ Yes
- ☐ No

**k) Disinfection guideline for visitor?**

- ☐ Yes
- ☐ No

iv. Biosecurity practices after diseases outbreak/mortality event

---

**a) Follow complete harvesting:**

- ☐ Yes
- ☐ No

**b) Disinfect pond water:**

- ☐ Yes
- ☐ No

**If yes how? Please specify name and dose of treatment used**

---

**c) Continue production cycle without any disinfection:**

- ☐ Yes
- ☐ No

**e) Any observation of similar diseases occurrence again and again?**

- ☐ Yes
- ☐ No

**If yes how frequent**

- ☐ 2 times a year
- ☐ 3 times a year
- ☐ 4 times a year
- ☐ last year and this year
- ☐ Continuing for last few years

**Severity of the diseases during multiple events?**

- ☐ More severe than earlier
- ☐ Less severe than earlier
- ☐ Similar with earlier

**6. Farmer's observation and opinion****i. Any stressor factor for diseases occurrences? Please specify****ii. Any diseases occurrences in nearby farms and spread from that farm to his farm?**

- ☐ Yes
- ☐ No

**if yes was it similar types with the neighbor farm?**

- ☐ Yes
- ☐ No

**iii. What measures farmer take to prevent diseases occurrences? Please specify****iv. Did he received any training on biosecurity?**

- ☐ Yes
- ☐ No

**v. What support he needs to follow proper biosecurity for farming?**

---

**vi. Any other information he would like to provide:**

---
